# Supplementary material for: MultiPhen: Joint Model of Multiple Phenotypes Can Increase Discovery in GWAS
Source: PLOS journal article supplement (doi:10.1371/journal.pone.0034861), 2012-05-02
Supplement: S15 (10.1371/journal.pone.0034861.s015) [file journal.pone.0034861.s015]

Behaviour under the null:  $\rho=0.5$

| Scenario                                                             | P-value<br>E(N)<P | 0.05 | 0.01 | 1e-3 | 1e-4 | 1e-5 | 1e-6 | 1e-7 | 1e-8 |
|----------------------------------------------------------------------|-------------------|------|------|------|------|------|------|------|------|
|                                                                      |                   | 5000 | 1000 | 100  | 10   | 1    | 0.1  | 0.01 | 1e-3 |
| <i>continuous</i><br><i>without outliers</i><br><i>MAF=30%</i>       | MultiPhen         | 4997 | 962  | 106  | 8    | 2    | 1    | 0    |      |
|                                                                      | CCA               | 4951 | 970  | 96   | 8    | 2    | 1    | 0    |      |
|                                                                      | UNI               | 5203 | 1031 | 115  | 12   | 2    | 0    |      |      |
| <i>continuous</i><br><i>without outliers</i><br><i>MAF=0.5%</i>      | MultiPhen         | 5030 | 977  | 112  | 12   | 1    | 0    |      |      |
|                                                                      | CCA               | 4993 | 973  | 112  | 12   | 1    | 0    |      |      |
|                                                                      | UNI               | 5345 | 1092 | 103  | 13   | 4    | 0    |      |      |
| <i>continuous</i><br><i>without outliers</i><br><i>MAF=5%, N=200</i> | MultiPhen         | 5268 | 1079 | 127  | 15   | 1    | 0    |      |      |
|                                                                      | CCA               | 5042 | 1010 | 105  | 10   | 1    | 0    |      |      |
|                                                                      | UNI               | 5287 | 1126 | 117  | 11   | 0    |      |      |      |
| <i>continuous</i><br><i>with outliers</i><br><i>MAF=30%</i>          | MultiPhen         | 5041 | 988  | 102  | 14   | 3    | 0    |      |      |
|                                                                      | CCA               | 4995 | 977  | 103  | 8    | 1    | 0    |      |      |
|                                                                      | UNI               | 5350 | 1042 | 104  | 11   | 1    | 0    |      |      |
| <i>continuous</i><br><i>with outliers</i><br><i>MAF=0.5%</i>         | MultiPhen         | 4513 | 952  | 83   | 8    | 1    | 0    |      |      |
|                                                                      | CCA               | 5244 | 1419 | 317  | 130  | 74   | 51   | 41   | 26   |
|                                                                      | UNI               | 5612 | 1446 | 293  | 107  | 57   | 37   | 26   | 19   |
| <i>continuous</i><br><i>with outliers</i><br><i>MAF=5%, N=200</i>    | MultiPhen         | 5220 | 1111 | 108  | 8    | 0    |      |      |      |
|                                                                      | CCA               | 5336 | 1282 | 196  | 31   | 16   | 4    | 3    | 2    |
|                                                                      | UNI               | 5562 | 1316 | 174  | 30   | 9    | 3    | 1    | 0    |
| <i>binary</i><br><i>MAF=30%</i>                                      | MultiPhen         | 4866 | 940  | 93   | 11   | 2    | 0    |      |      |
|                                                                      | CCA               | 4959 | 955  | 98   | 9    | 1    | 0    |      |      |
|                                                                      | UNI               | 5554 | 1047 | 111  | 13   | 0    |      |      |      |
| <i>binary</i><br><i>MAF=0.5%</i>                                     | MultiPhen         | 5485 | 1315 | 107  | 10   | 2    | 0    |      |      |
|                                                                      | CCA               | 4942 | 1048 | 152  | 24   | 6    | 2    | 1    | 0    |
|                                                                      | UNI               | 5455 | 1231 | 177  | 31   | 8    | 2    | 1    | 0    |
| <i>binary</i><br><i>MAF=5%, N=200</i>                                | MultiPhen         | 5759 | 989  | 94   | 14   | 1    | 0    |      |      |
|                                                                      | CCA               | 4608 | 1087 | 204  | 50   | 17   | 5    | 2    | 0    |
|                                                                      | UNI               | 5056 | 1383 | 266  | 61   | 22   | 7    | 2    | 2    |
